# Supplementary material
Source: PubMed Central journal article supplement (PMC4165449)
Supplement: ac502055e_si_001.pdf [file ac502055e_si_001.pdf]

## **Supporting Information for:**

# **Experimental Evaluation and Optimization of Structures for Lossless Ion Manipulations for Ion Mobility Spectrometry/Time-of-Flight Mass Spectrometry**

Ian K. Webb, Sandilya V. B. Garimella, Aleksey V. Tolmachev, Tsung-Chi Chen, Xinyu Zhang, Randolph V. Norheim, Spencer A. Prost, Brian LaMarche, Gordon A. Anderson, Yehia M. Ibrahim, and Richard D. Smith\*

Biological Sciences Division and Environmental Molecular Sciences Laboratory

Pacific Northwest National Laboratory

3335 Innovation Ave. (K8-98)

P.O. Box 999

Richland, Washington, USA 99352

\*Corresponding Author. E-mail: [rds@pnnl.gov](mailto:rds@pnnl.gov)

Keywords: Ion mobility spectrometry, RF Confinement, SLIM, resolving power, ion optics, manipulation, conveyor.

**Abstract.** The supporting information includes three figures to help illuminate certain points in the text. The first figure illustrates ion trajectories through the turn as a function of confining RF amplitude (S3). Supplemental Figure 2 gives an example IMS separation of an equimolar mixture of 9 peptides (S4). Supplemental Figure 3 is a graphic that depicts the DC potentials applied in the turning region (S5).

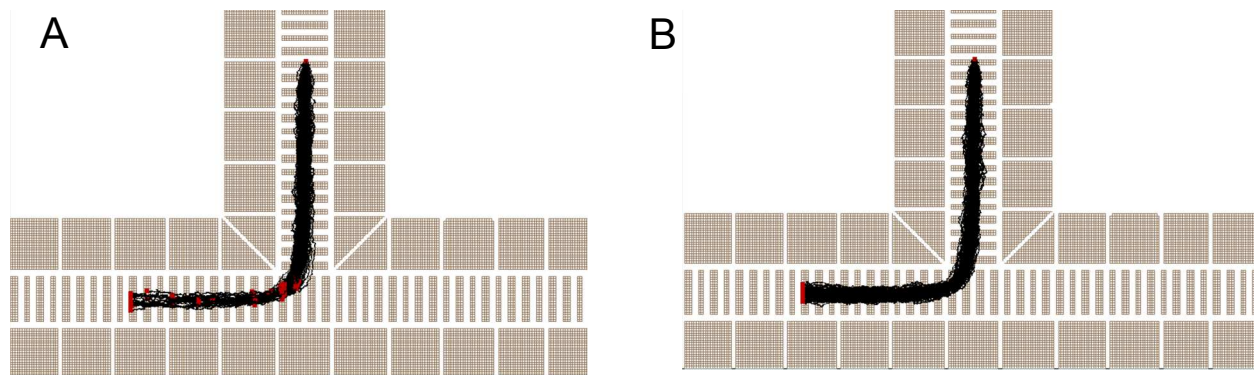

**Supplemental Figure 1.** SIMION ion trajectory simulation of  $m/z$  922 ions through the turning region with RF amplitude of (a)  $160 V_{p-p}$  and (b)  $320 V_{p-p}$ . The dots represent where ions collide with electrodes.

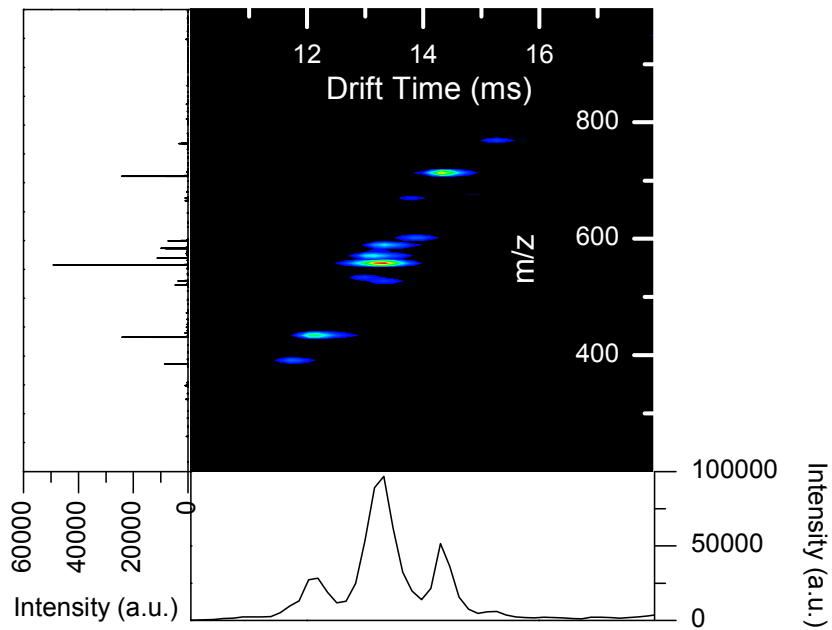

**Supplemental Figure 2.** Example nested IMS/MS spectrum of 9 peptide mix from the linear only SLIM module. Gate opening time was 486  $\mu\text{s}$  with an electric field of 20 V/cm and confining RF of 750 kHz, 220 V<sub>p-p</sub> and guard DC bias of 5 V.

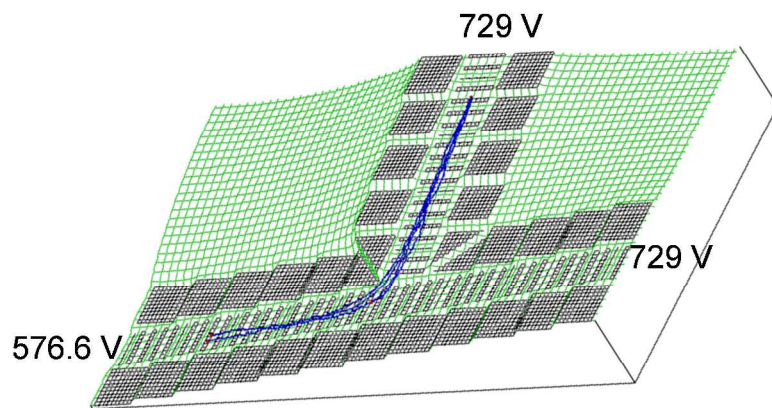

**Supplemental Figure 3.** SIMION calculation of the DC potentials for the turn, where height from the surface of the page represents the magnitude of the DC voltages. Voltages used for a drift field of 20 V/cm are shown.
